# Supplementary material for: Pandemic impact on patients with advanced non-COVID-19 illness and their family carers receiving specialised palliative home care: a qualitative study
Source: HighWire-hosted journal article supplement (doi:10.1136/bmjopen-2021-059577), 2022-05-01
Supplement: bmjopen-2021-059577supp001_data_supplement.pdf [file bmjopen-2021-059577supp001_data_supplement.pdf]

**Interview guide patients**

Can you describe what it was like when the pandemic started?

How is your daily life now?

Has something become difficult for you now or is there anything you have been missing?

Have you found something helpful?

What has been supportive in your situation now?

**Interview guide carer**

Can you describe what it was like when the pandemic started?

How is your daily life now?

Has something become difficult for you now or is there anything you have been missing?

Have you found something helpful?

What has been supportive in your situation now?

What are your thoughts about the [patient's] situation today?
